# Supplementary material for: Chemical conversion of biomass-derived hexose sugars to levulinic acid over sulfonic acid-functionalized graphene oxide catalysts
Source: Royal Society of Chemistry journal article supplement (doi:10.1039/c3gc40353j), 2013-01-01
Supplement: c3gc40353j.pdf [file c3gc40353j.pdf]

## Supporting Information

### Decomposition of Biomass-derived Hexose Sugars to Levulinic Acid Using Graphene Oxide Catalysts with Brønsted Acid Sites

Pravin P. Upare,<sup>[a, b]</sup> Ji-Woong Yoon,<sup>[a]</sup> Mi Yeon Kim,<sup>[a, b]</sup> Hyo-Yoon Kang,<sup>[a, b]</sup> Dong Won Hwang,<sup>[a]</sup>

Young Kyu Hwang,<sup>\*[a, b, c]</sup> Harold H. Kung,<sup>[c]</sup> and Jong-San Chang<sup>[a, b]</sup>

<sup>a</sup> Catalysis Center for Molecular Engineering, Korea Research Institute of Chemical Technology (KRICT), Jang-dong 100, Yuseong, Daejeon 305-600 (Korea)

<sup>b</sup> Department of Green Chemistry, School of Science, University of Science and Technology (UST), 113, Gwahangno, Youeong-gu, Daejeon, 305-333, Korea

<sup>c</sup> Department of Chemical and Biological Engineering, Northwestern University, Evanston, IL 60208–3120, USA

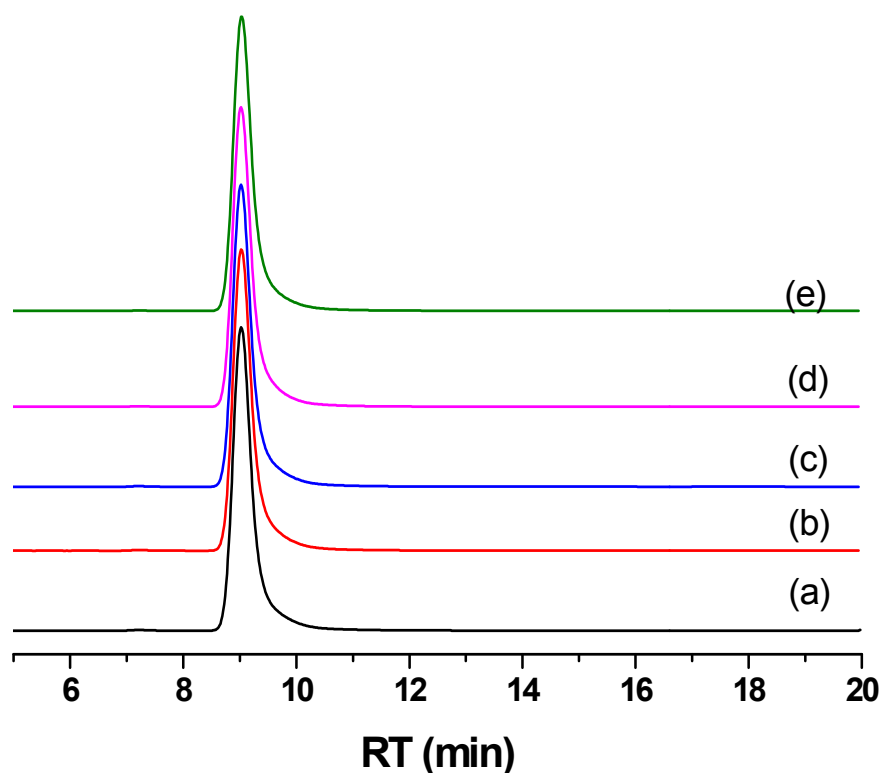

**Figure S1.** HPLC chromatogram (a) 5% aqueous glucose solution, (b) GO, (c) Carbon, (d) AC-SO<sub>3</sub>H and (e) GO-SO<sub>3</sub>H absorbed 5% glucose solution, respectively.

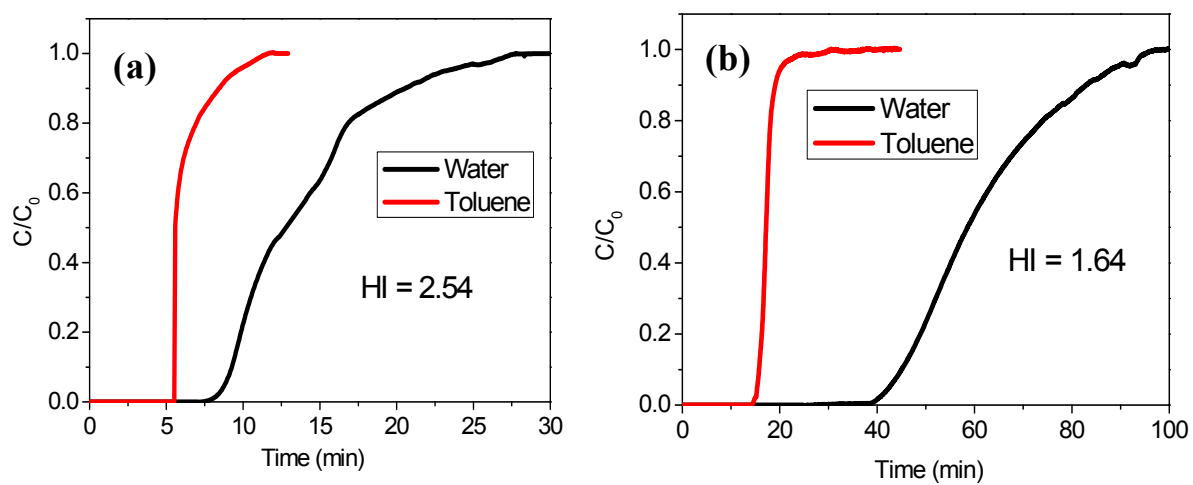

**Figure S2.** Breakthrough curves of equimolar water and toluene mixture in helium on (a) GO-SO<sub>3</sub>H and (b) AC-SO<sub>3</sub>H catalysts at 35°C. Before test, catalysts were pretreated at 150 °C for 3 h with 15cc/min of helium.

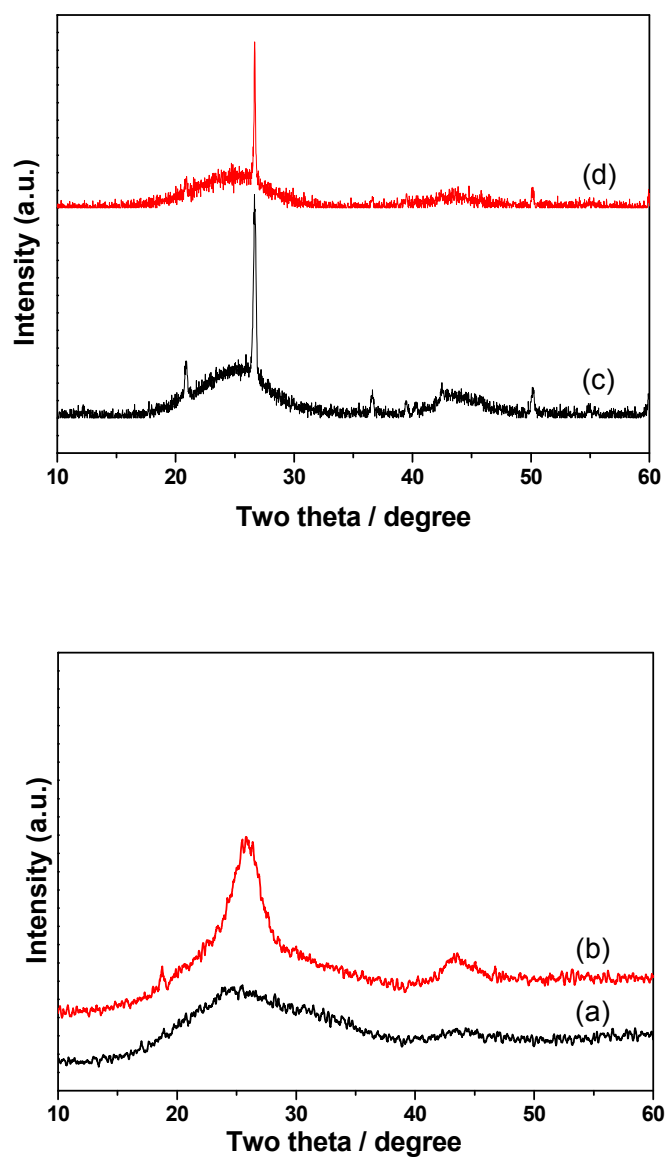

**Figure S3.** X-ray diffraction patterns of (a) Graphene oxide (GO), (b) SO<sub>3</sub>H functionalized graphene oxide (GO-SO<sub>3</sub>H), (c) activated carbon (AC) and (d) SO<sub>3</sub>H functionalized activated carbon (AC-SO<sub>3</sub>H), respectively.

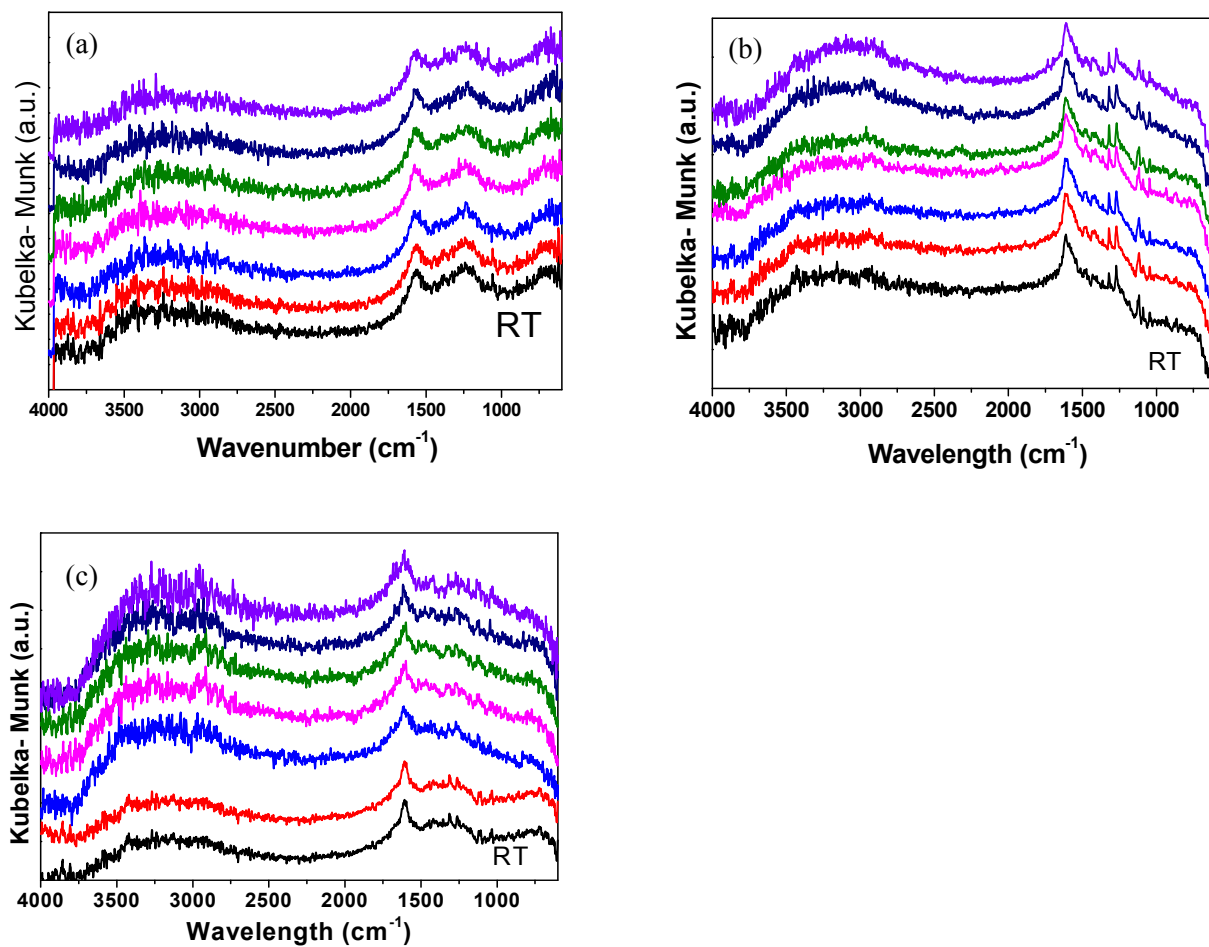

**Figure S4.** Diffuse Reflectance(DR) FT-IR spectra of (a) Graphene oxide (GO), (b) SO<sub>3</sub>H functionalized graphene oxide (GO-SO<sub>3</sub>H) and (c) SO<sub>3</sub>H functionalized activated carbon (AC-SO<sub>3</sub>H), respectively. The DR FT-IR analysis was performed with 500 scans and a resolution of 4cm<sup>-1</sup>. The spectra were presented by Kuelka-Munk funciton. Spectra was obtained with 50°C interval from second to top lines in (a), (b) and (c)..

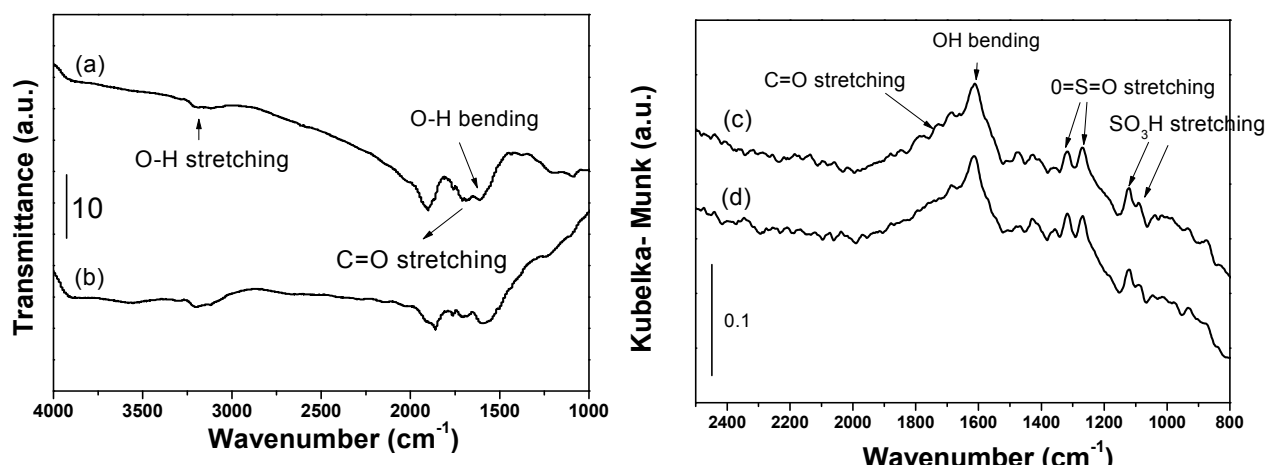

**Figure S5.** Transmittance and Diffuse Reflectance(DR) FT-IR spectra of (a) and (c) as-synthesized SO<sub>3</sub>H functionalized graphene oxide (GO-SO<sub>3</sub>H), and (b) and (d) thermally treated SO<sub>3</sub>H functionalized graphene oxide (GO-SO<sub>3</sub>H) at 300 °C for 12 h, respectively. The DR FT-IR analysis was performed with 500 scans and a resolution of 4 cm<sup>-1</sup>. The spectra were presented by Kubelka-Munk function.

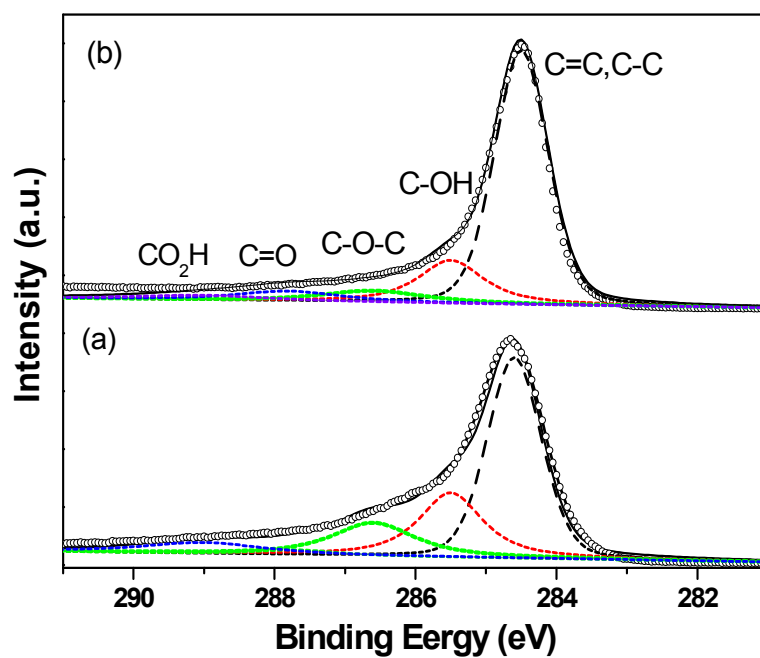

**Figure S6.** XPS profile of the C1s region of: (a) GO and (b) GO-SO<sub>3</sub>H. The XPS peaks were fitted to Voigt functions, after performing a linear background subtraction (XPSPEAK Version 4.1). Color segmented lines indicate the contributions from various functional groups obtained by deconvolution.

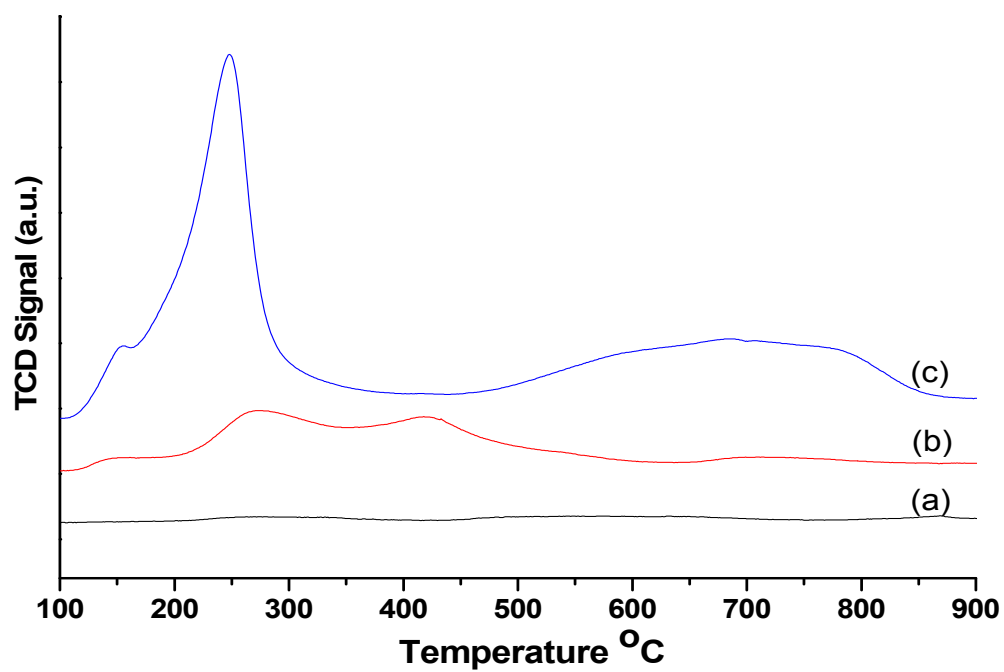

**Figure S7.** NH<sub>3</sub>-TPD( temperature programmed desorption) of (a) GO, (b) GO-SO<sub>3</sub>H and (b) AC-SO<sub>3</sub>H.

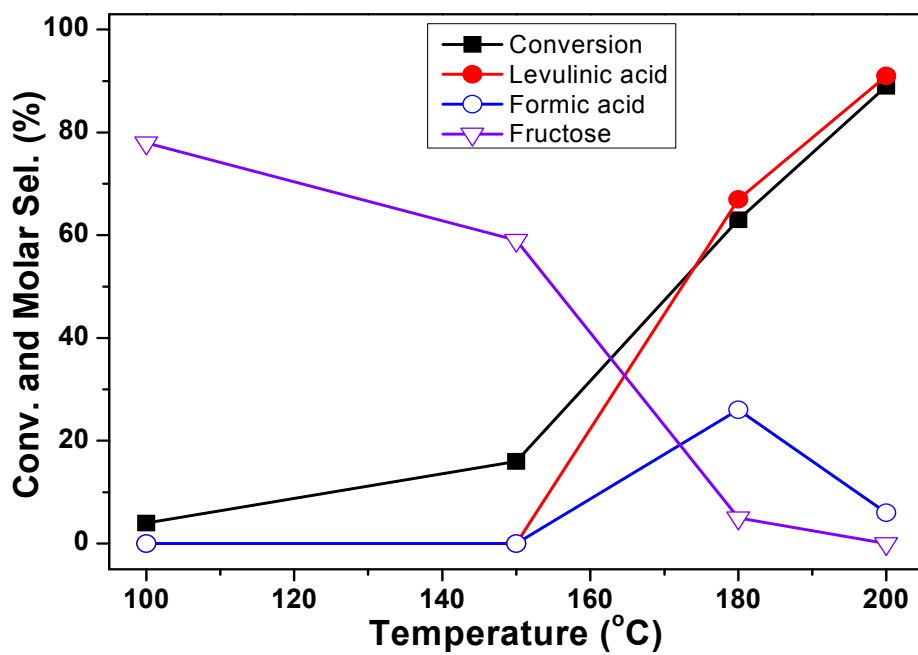

**Figure S8.** Effect of temperature on the activity of GO-SO<sub>3</sub>H for glucose decomposition. Reaction conditions: Catalyst 0.5 g, glucose 30 g in 200 ml distilled water, reaction time of 2 h.



**Table S1.** Relative contents of surface functional groups of GO, AC, GO-SO<sub>3</sub>H, and AC-SO<sub>3</sub>H from C1S XPS

| Samples              | Bond              | Position (eV) | Area    | Area (%) |
|----------------------|-------------------|---------------|---------|----------|
| GO-SO <sub>3</sub> H | C=C,C-C           | 284.5         | 45951   | 65       |
|                      | C-OH,             | 285.5         | 12052   | 24       |
|                      | COC               | 286.6         | 5225    |          |
|                      | C=O,              | 287.8         | 4677    | 11       |
|                      | CO <sub>2</sub> H | 289           | 2716    |          |
| GO                   | C=C,C-C           | 284.6         | 36672   | 50       |
|                      | C-OH              | 285.5         | 17488   | 40       |
|                      | COC               | 286.6         | 11831   |          |
|                      | C=O               | 287.7         | 1778    | 10       |
|                      | CO <sub>2</sub> H | 289.0         | 5831    |          |
| Samples              | Bond              | Position (eV) | Area    | Area (%) |
| AC-SO <sub>3</sub> H | C=C,C-C           | 284.4         | 20634.0 | 61       |
|                      | C-S, C-OH         | 285.4         | 5365.4  | 27       |
|                      | COC               | 286.6         | 3873.4  |          |
|                      | C=O               | 287.8         | 2108.7  | 11       |
|                      | CO <sub>2</sub> H | 289.0         | 1774.4  |          |
| AC                   | C=C,C-C           | 284.1         | 20950   | 64       |
|                      | C-OH              | 285.4         | 3431    | 21       |
|                      | COC               | 286.6         | 3274    |          |
|                      | C=O               | 287.8         | 2892    | 15       |
|                      | CO <sub>2</sub> H | 289.0         | 1947    |          |

**Table S2.** Elemental analysis (EA) results of C, H, O, S in catalysts

| Materials             | C<br>mmol/g | H<br>mmol/g | O<br>mmol/g | S<br>mmol/g | C/O<br>Ratio |
|-----------------------|-------------|-------------|-------------|-------------|--------------|
| GO-SO <sub>3</sub> H  | 80          | 7.92        | 10.57       | 1.17        | 7.56         |
| AC- SO <sub>3</sub> H | 61.86       | 15.55       | 19.96       | 2.50        | 3.10         |
| GO                    | 90.49       | 4.14        | 6.16        | 0           | 14.12        |

**Table S3.** Amount of functional group density from titration and elemental analysis (EA)

| Materials                         | Functional group density from titration |                     |                       |                                                  | S density from EA mmol/g |
|-----------------------------------|-----------------------------------------|---------------------|-----------------------|--------------------------------------------------|--------------------------|
|                                   | Total functional group density mmol /g  | -OH density mmol /g | -COOH density mmol /g | -SO <sub>3</sub> H sulfate and densities mmol /g |                          |
| GO                                | 1.84                                    | 1.02                | 0.82                  | -                                                | -                        |
| GO-SO <sub>3</sub> H              | 2.70                                    | 0.40                | 0.60                  | 1.60                                             | 1.20                     |
| Carbon                            | 2.14                                    | 1.80                | 0.30                  | -                                                | -                        |
| AC-SO <sub>3</sub> H              | 5.80                                    | 1.50                | 0.24                  | 3.96                                             | 2.50                     |
| <sup>a</sup> GO-SO <sub>3</sub> H | 2.77                                    | 0.55                | 0.66                  | 1.56                                             | 1.20                     |

a.Catalyst pretreated at 300 °C in N<sub>2</sub>.

**Figurer S4.** Regeneration of GO-SO<sub>3</sub>H catalyst for glucose hydrolysis.

| Material             | Recycle | Conv.<br>% | Selectivities (%) |    |          | S<br>mmol/g<br>(EA) | TON |
|----------------------|---------|------------|-------------------|----|----------|---------------------|-----|
|                      |         |            | LA                | FA | Fructose |                     |     |
| GO-SO <sub>3</sub> H | 1       | 89         | 88                | 8  | 0        | 1.20                | 124 |
|                      | 2       | 86         | 81                | 11 | 6        | 1.12                | 128 |
|                      | 3       | 83         | 76                | 12 | 10       | 1.09                | 127 |
|                      | 4       | 78         | 71                | 14 | 14       | 0.89                | 146 |
|                      | 5       | 72         | 63                | 19 | 17       | 0.81                | 148 |

**Table S5.** Cellulose and fructose hydrolysis by GO-SO<sub>3</sub>H

| Catalyst             | Feed stocks | pressure<br>bar | Molar Yield (%) |    |         |
|----------------------|-------------|-----------------|-----------------|----|---------|
|                      |             |                 | LA              | FA | Glucose |
| GO-SO <sub>3</sub> H | Cellulose   | 16              | 23              | 10 | 36      |

Reaction conditions: Catalyst 0.5 g, alfa cellulose 10 gm in 200 ml distilled water used , Auto generated pressure has been given in above table, reaction time of 2 hrs.

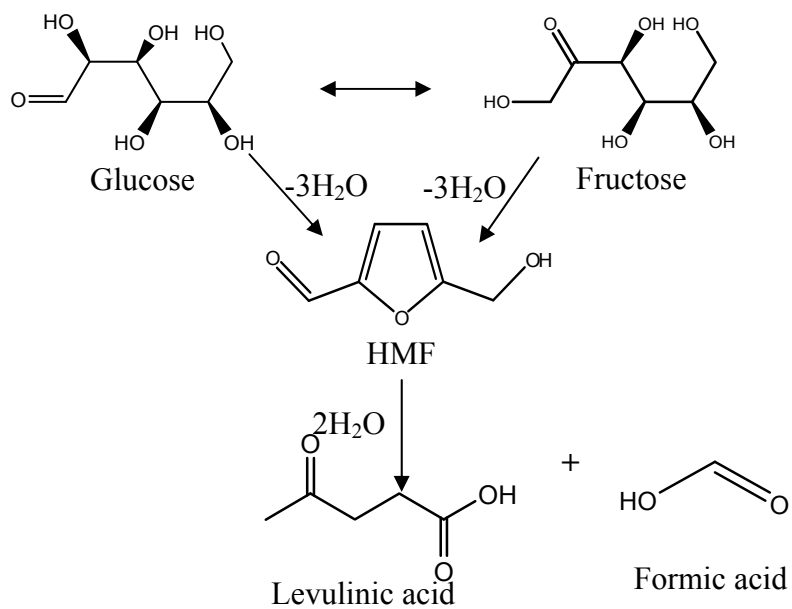

**Scheme S1.** The proposed reaction pathway of formation of levulinic and formic acids from hexoses decomposition.
